# GATA2 Mediates Thyrotropin-Releasing Hormone-Induced Transcriptional Activation of the Thyrotropin $\beta$ Gene

Kenji Ohba, Shigekazu Sasaki\*, Akio Matsushita, Hiroyuki Iwaki, Hideyuki Matsunaga, Shingo Suzuki, Keiko Ishizuka, Hiroko Misawa, Yutaka Oki, Hirotohi Nakamura

Second Division, Department of Internal Medicine, Hamamatsu University School of Medicine, Hamamatsu, Shizuoka, Japan

## Abstract

Thyrotropin-releasing hormone (TRH) activates not only the secretion of thyrotropin (TSH) but also the transcription of TSH $\beta$  and  $\alpha$ -glycoprotein ( $\alpha$ GSU) subunit genes. TSH $\beta$  expression is maintained by two transcription factors, Pit1 and GATA2, and is negatively regulated by thyroid hormone (T3). Our prior studies suggest that the main activator of the TSH $\beta$  gene is GATA2, not Pit1 or unliganded T3 receptor (TR). In previous studies on the mechanism of TRH-induced activation of the TSH $\beta$  gene, the involvements of Pit1 and TR have been investigated, but the role of GATA2 has not been clarified. Using kidney-derived CV1 cells and pituitary-derived GH3 and T $\alpha$ T1 cells, we demonstrate here that TRH signaling enhances GATA2-dependent activation of the TSH $\beta$  promoter and that TRH-induced activity is abolished by amino acid substitution in the GATA2-Zn finger domain or mutation of GATA-responsive element in the TSH $\beta$  gene. In CV1 cells transfected with TRH receptor expression plasmid, GATA2-dependent transactivation of  $\alpha$ GSU and endothelin-1 promoters was enhanced by TRH. In the gel shift assay, TRH signal potentiated the DNA-binding capacity of GATA2. While inhibition by T3 is dominant over TRH-induced activation, unliganded TR or the putative negative T3-responsive element are not required for TRH-induced stimulation. Studies using GH3 cells showed that TRH-induced activity of the TSH $\beta$  promoter depends on protein kinase C but not the mitogen-activated protein kinase, suggesting that the signaling pathway is different from that in the prolactin gene. These results indicate that GATA2 is the principal mediator of the TRH signaling pathway in TSH $\beta$  expression.

**Citation:** Ohba K, Sasaki S, Matsushita A, Iwaki H, Matsunaga H, et al. (2011) GATA2 Mediates Thyrotropin-Releasing Hormone-Induced Transcriptional Activation of the Thyrotropin  $\beta$  Gene. PLoS ONE 6(4): e18667. doi:10.1371/journal.pone.0018667

**Editor:** Immo A. Hansen, New Mexico State University, United States of America

**Received:** December 17, 2010; **Accepted:** March 8, 2011; **Published:** April 14, 2011

**Copyright:** © 2011 Ohba et al. This is an open-access article distributed under the terms of the Creative Commons Attribution License, which permits unrestricted use, distribution, and reproduction in any medium, provided the original author and source are credited.

**Funding:** This work was supported in part by a Health Sciences Research Grant to H.N., a Grant-in Aid for Scientific Research to S.S. and H.N. from the Ministry of Education, Culture, Sports, Science and Technology in Japan (grant number 20591092) and a Yamaguchi Endocrine Research Association grant to S.S. The funders had no role in study design, data collection and analysis, decision to publish, or preparation of the manuscript.

**Competing Interests:** The authors have declared that no competing interests exist.

\* E-mail: sasakis@hama-med.ac.jp

## Introduction

The hypothalamus–pituitary–thyroid (H-P-T) axis is the central mechanism for thyroid hormone (T3) homeostasis [1,2]. Thyrotropin (TSH) is a heterodimer of the  $\alpha$  chain ( $\alpha$  subunit of glycoprotein hormone,  $\alpha$ GSU) and  $\beta$  chain (TSH $\beta$ ). TSH $\beta$  is specific to TSH while  $\alpha$ GSU is common to luteinizing hormone, follicle-stimulating hormone and chorionic gonadotropin [3]. Secretion of the TSH molecule from thyrotroph and the transcriptions of TSH $\beta$  and  $\alpha$ GSU genes are stimulated by the thyrotropin-releasing hormone (TRH) generated in the hypothalamic paraventricular nucleus. In rat pituitary primary culture, for example, TRH treatment increases  $\alpha$ GSU and TSH $\beta$  mRNA [4,5]. Conversely, TSH $\beta$  expression is attenuated in mice homologous for a TRH-null allele after birth [6]. TRH receptor (TRH-R) is encoded by two genes and generates TRH-R1 and 2. In the pituitary, TRH-R1 but not TRH-R2 is expressed and mediates the TRH signal [7]. TRH-bound TRH-R1 (TRH/TRH-R1) induces protein kinase C (PKC)-, phosphatidylinositol- and Ca<sup>2+</sup>-mediated pathways [8,9]. PKC subsequently potentiates multiple transcription factors, including Jun and Fos, via the AP-1 site [10]; however, the mechanism that mediates

TRH signaling for transcription of the TSH $\beta$  gene has been elusive.

A pituitary-specific transcription factor, Pit1, has been postulated to be a candidate mediator of TRH signaling in TSH $\beta$  gene regulation. This possibility is supported by the fact that Pit1 mutations cause compound pituitary hormone deficiency (CPHD) [11], in which expressions of the TSH $\beta$  gene as well as the prolactin (PRL) and growth hormone (GH) genes are decreased or abolished. Using reporter assays with somato-lactotroph-derived GH3 [12] cells and gel shift assays, Shupnik et al. [13,14] reported two Pit1 binding sites, TSH-A (nt. –274/–258) and C (nt. –402/–384) while Steinfeld et al. [15,16] demonstrated other putative Pit1 binding sites within nt. –128/+8 of the human TSH $\beta$  gene. Although Gordon et al. [17] confirmed that Pit1 recognizes the DNA sequences in the mouse TSH $\beta$  gene corresponding to those sites in the rat and human genomes using DNA foot printing, overexpression of Pit1 had a minimal effect on the activity of the TSH $\beta$  promoter in TtT97 TSHoma or thyrotroph-derived  $\alpha$ TSH cells. Similar results were reported with kidney-derived 293 cells over-expressed with Pit1 [18]. Consistently, TRH treatment does not enhance transcriptional activity of the fusion protein Gal4-Pit1, where the Pit1-derived transactivation domain was fused with

the Gal4-DNA binding domain [19]. Although Pit1 may be phosphorylated at serine (codon 115) and threonine (codon 220) by PKA [20] or by TRH signaling [15,16], mutations of these amino acids have no effect on its transactivation function in the PRL promoter [19,21].

T3 inhibits transcription of the TSH $\beta$  gene via thyroid hormone receptor (TR) [1], and TSH $\beta$  expression increases in patients with hypothyroidism. This raises the possibility that unliganded TR may function as a transcriptional activator of the TSH $\beta$  gene [22–24]. Based on this hypothesis, the putative negative T3 responsive element (nTRE) has been reported as the sequence required for activation by unliganded TR and inhibition by T3 [22,25]. Because an AP-1-like sequence [26] overlaps with the reported nTRE, it was suggested that interaction of unliganded TR with Jun/Fos may play a role in the TRH signaling pathway [27]; however, the findings that TSH $\beta$  expression can be maintained in TR-null mice [24,28] rejected the possibility that unliganded TR is an activator, indicating the presence of another transcriptional activator [29].

As a TSH $\beta$ -related transcription factor that exists in TtT97 TSHoma cells but not in GH3 cells, Gordon et al. [30] identified GATA2. In vivo analysis using transgenic mice revealed that co-expression of GATA2 with Pit1 directs the differentiation of thyrotroph in the pituitary [3]. We reported that the true transcriptional activator for the TSH $\beta$  gene is GATA2 but not Pit1 and that Pit1 protects GATA2 from inhibition by the suppressor region (SR) located in the 3'-flanking region of GATA2 [31]. We reported that when TR is coexpressed with GATA2 and Pit1, T3-dependent inhibition is easily detected in kidney-derived CV1 cells [32], which have been used in the studies of transcriptional activation by T3/TR (positive regulation) [29,33,34]. Establishment of this experimental system suggests that thyrotroph-specific factors other than Pit1 and GATA2 may not be essential for T3-dependent negative regulation of the TSH $\beta$  gene [29]. Indeed, repression by T3 was not affected by the expression of other known cofactors except thyroid receptor-associated protein (TRAP) 220/MED1 [29,33]. This system revealed that unliganded TR without Pit1 and GATA2 is not the activator of the TSH $\beta$  gene [29]. We found that a putative nTRE/AP-1-like sequence is dispensable for T3-dependent inhibition [33] and proposed a model in which T3-bound TR (T3/TR) interferes with the transactivation function of GATA2, resulting in negative regulation of the TSH $\beta$  gene [33]. In this regard, the role of unliganded TR in the TRH signaling pathway should be re-considered.

Whereas Charles et al. [35] reported that TSH $\beta$  expression in pituitary-specific GATA2 knockout mice was not increased in the hypothyroid condition, where hypothalamic TRH secretion is increased, the functional relevance of GATA2 in TRH signaling was not clarified. To exclude the influence of negative feedback regulation by T3 on TRH production, we employed reporter assays in cultured cells. We demonstrate here that GATA2, but not Pit1 or unliganded TR, is the principal mediator of the TRH signal in transcriptional activation of the TSH $\beta$  gene.

## Materials and Methods

### Plasmid constructions

Because T3/TR has a tendency to suppress the firefly luciferase-based reporter gene [29,33], we employed the CAT- and modified Renilla luciferase (hRluc)-based reporter systems (Promega, Madison, WI, USA). The human TSH $\beta$  promoters encompassing nt. -1193/+37 and nt. -128 to +37 were fused with the CAT gene, generating TSH $\beta$ (-1193/+37)-CAT and

TSH $\beta$ (-128/+37)-CAT, respectively [29]. In these reporter plasmids, the pUC-derived AP-1 site [29], which may mediate PKC signal, was deleted from the original plasmid [22,26,27]. TSH $\beta$ -M1-mXmYmZ-CAT, TSH $\beta$ -M3-CAT, TSH $\beta$ (-128/+37)-hRluc and TSH $\beta$ -mP-M1-hRluc were reported elsewhere [31,33]. The downstream GATA-RE in TSH $\beta$ (-128/+37)-hRluc was mutated from AGATAA to AGATCA using site-directed mutagenesis (Stratagene, La Jolla, CA), generating TSH $\beta$ (-128/+37)-G2C-hRluc. Expression plasmids for human Pit1 (pCB<sup>6</sup>-hPit1), mouse GATA2 (pcDNA3-mGATA2), and the deletion constructs of GATA2 (GATA2-NZ, GATA2-ZC, and GATA2-Zf) have been described elsewhere [33]. All mutated sequences and subcloning sites were confirmed by sequencing.

### Cell culture and transient transfection

CV1 [32] and GH3 [12] cells were grown in monolayer culture at 37 C under CO<sub>2</sub>/air (1:19) in Dulbecco's modified Eagle's medium (DMEM) containing 10% (v/v) fetal calf serum (FCS), penicillin G (100 units/ml), and streptomycin (100  $\mu$ g/ml). T $\alpha$ T1 cells, a thyrotroph cell line from the mouse pituitary [36], were seeded on Matrigel-coated plates (Becton Dickinson Labware, Bedford, MA, U.S.A.) and maintained under the same conditions as CV1 and GH3 cells. All cells were trypsinized and plated in 6-well plates for 24 h before transient transfection. CV1 cells at a density of  $2 \times 10^5$  cells per well were transfected using the calcium phosphate technique, as described previously [37]. GH3 and T $\alpha$ T1 cells at a density of  $6 \times 10^5$  and  $3 \times 10^5$  cells per well were transfected using lipofectamine reagent (Promega) according to the manufacturer's protocol. After cells had been exposed to calcium phosphate/DNA precipitates or lipofectamine reagent for 20 or 5 h, the medium was replaced with fresh DMEM containing 5% fetal calf serum depleted of thyroid hormone [37] or medium supplemented with TRH, tetradecanoylphorbol acetate (TPA) or forskolin. After incubation for an additional 24 h, cells were harvested. CAT and  $\beta$ -galactosidase activities were measured as described previously [37]. Luciferase activities were measured with the Luciferase Assay System or Renilla Luciferase Assay System (Promega) using a Lumiscounter 700 (Microtech Nichi-on, Chiba, Japan) [31,33]. Protein concentration was determined by OD280. For each reporter assay, we performed transfection with pCMV-CAT, pGL4.13[luc2/SV40], or pGL4.74[hRluc/TK], the magnitudes of which were adjusted to a value of 100%.

### Western blot

To assess the expression level of wild-type GATA2 and C349A mutant, CV1 cells in a 10 cm dish were transfected with an equal amount (10  $\mu$ g/dish) of expression plasmids for wild-type or mutant GATA2s. After incubation for an additional 24 h, cells were harvested and whole cell extracts were fractionated by SDS-PAGE and subjected to Western blot with anti-GATA2 antibody (a kind gift from Dr. Takashi Minami, University of Tokyo).

### Gel shift assay

PG-probe (wild-type TSH $\beta$  sense; 5'-cagtatgaattttcaatagatgcttttcagataagaaa-3' and antisense; 5'-ttttctatctgaaagcatctattgaaattcactactg-3') were labeled with  $\gamma$ -<sup>32</sup>P-ATP using T4 polynucleotide kinase (Toyobo, Tokyo, Japan). CV1 cells were transfected with pcDNA3-mGATA2 (5  $\mu$ g per 10 cm dish). After incubation with TRH or TPA, cells were harvested. Nuclear extracts (NEs) from CV1 cells were prepared as described previously [31]. The  $\gamma$ -<sup>32</sup>P-labeled probes and 2  $\mu$ g NEs from transfected CV1 cells were incubated for 30 min on ice in 20  $\mu$ l binding buffer containing 10 mM Tris-HCl (pH 7.6), 50 mM KCl, 0.05 mM EDTA, 2.5 mM MgCl<sub>2</sub>, 8.5% glycerol, 1 mM dithiothreitol, 0.5  $\mu$ g/ml

poly (dI-dC), 0.1% TritonX-100, and 1 mg/ml nonfat dry milk. DNA-protein complexes were resolved by electrophoresis on a 5% polyacrylamide gel at 100 V for 80 min at room temperature. For the supershift assay, antibodies against GATA2 (SC-267; Santa Cruz, CA, USA) were added. The gel was dried and labeled bands were visualized using the BAS-1000 autoradiography system (Fuji Film, Tokyo, Japan).

### Statistical analysis

Each reporter assay was performed in duplicate more than three times, and each result is expressed as the mean  $\pm$  S.D. Statistical significance was examined by ANOVA and Fisher's protected least significant difference test using StatView 4.0 software (Abacus Concepts, Berkeley, CA, USA).  $P < 0.05$  was considered significant.

## Results

### TRH signaling enhances the transactivation of Pit1 and GATA2-dependent activity of the TSH $\beta$ gene in CV1 cells

The human TSH $\beta$  promoter encompassing nt.  $-1193/+37$  was fused to the CAT gene to generate TSH $\beta(-1193/+37)$ -CAT (Fig. 1A). As reported previously [29], co-expression of GATA2 and Pit1 activated TSH $\beta(-1193/+37)$ -CAT in CV1 cells (Fig. 1B, lane 1 and 2). The TRH-R1 gene generates long (412 aa) and short (387 aa) isoforms through alternative splicing of pre-mRNA [8]. In the presence of the long isoform, treatment with 100 nM TRH showed a further increase of promoter activity (Fig. 1B, lane 3 and 4). As shown in lane 5 and 6, the liganded short isoform elicited comparable potentiation. Since both TRH-R1s had similar effects and the long isoform is dominantly expressed in pituitary tissue [38], we employed it for further studies. It was reported that, in TtT97 TSHoma cells, the DNA sequence between nt.  $-271/-80$  in the mouse TSH $\beta$  promoter (corresponding to sequence nt  $-269/-78$  in the human gene) is sufficient for maximal promoter activity [39]. As shown in Fig. 1A, this region harbors a functional Pit1 binding site (Pit1-US) and two GATA-responsive elements (GATA-REs) [30]. These sequences are perfectly conserved in rodents and humans. We tested the effect of TRH/TRH-R1 on TSH $\beta(-128/+37)$ -CAT, which contains all of these elements (Fig. 1A), and again found that GATA2/Pit1-dependent activity (Fig. 1C, lane 1 and 2) was potentiated by TRH-R1 in the presence of 100 nM TRH (lane 3 and 6), suggesting that the TRH signal can be mediated via the region, nt  $-128/+37$ , containing Pit1-US and GATA-REs. The effect of TRH was dose-dependent (lane 3–7).

### Effect of TRH/TRH-R1 on Pit/GATA2-dependent activation of the TSH $\beta$ promoter is mediated by PKC but not PKA

Activation of the PKC signal by TRH/TRH-R1 is known to play a critical role in the expression of the PRL gene [9] as well as the TSH $\beta$  gene [13]. When CV1 cells were cotransfected with GATA2 and Pit1, the activity of TSH $\beta(-128/+37)$ -CAT was enhanced by the PKC activator, tetradecanoylphorbol acetate (TPA) (Fig. 1D). Although a cAMP-sensitive region (TSH-B) in the rat TSH $\beta$  promoter was reported at nt.  $-333/-325$  [13], TRH-induced activity in the presence of Pit1 and GATA2 was maintained in TSH $\beta(-128/+37)$ -CAT (Fig. 1C, lane 3 and 4), which lacks the sequence corresponding to TSH-B (nt  $-363/-355$  in the human genome, Fig. 1A). Thus, the stimulatory effect of TRH via Pit1 and GATA2 is independent of TSH-B. Whereas the PKA pathway may activate the TSH $\beta$  promoter via the interaction of Pit1 with CBP [40], the effect of forskolin on the Pit1/GATA2-dependent activity of the TSH $\beta$  gene was much smaller than that of TPA (Fig. 1D). The putative nTRE [27] in

human TSH $\beta$  promoter overlaps an AP-1-like sequence (nt.  $-1/+6$ ) [26]. To explore the involvement of this sequence in activation by TRH/TRH-R1, we tested a mutant reporter gene, TSH $\beta$ -DX1-CAT [33], where nTRE and AP-1-like sequences were deleted (Fig. 1A). Transactivation by TRH was not affected in this construct (Fig. 1E), suggesting that the reported nTRE or AP-1-like sequence is not required for the activity of the TSH $\beta$  promoter when it is stimulated by TRH via Pit1 and GATA2.

### TRH signaling potentiates the transactivating function of GATA2

We reported that the true transcriptional activator of the TSH $\beta$  gene is GATA2, while Pit1 protects GATA2 function from inhibition by the suppressor region (SR), which locates the 3'-flanking region of GATA-RE (Figs. 1A, 2A) [31]. In accordance with this, GATA2 alone can transactivate the SR-deleted construct, TSH $\beta$ -M3-CAT (Fig. 2B, lane 7). Notably, this activity was enhanced by TRH/TRH-R1. An identical result was found with TSH $\beta$ -M1-mXmYmZ-CAT (Fig. 2C), which contains only Pit1-US and GATA-REs (Fig. 2A). This construct was not activated by the mutant GATA2, C349A (Fig. 2C, inset), the DNA binding activity of which is disrupted [33]. Moreover, C349A was resistant to stimulation by TRH/TRH-R1 (Fig. 2C). The expression level of C349A was comparable with that of wild-type GATA2 (Fig. 2D). Thus, transactivation by GATA2 is important for not only basal but also TRH-induced activities of the TSH $\beta$  gene. As shown in Fig. 2E (upper panel), GATA-RE was reported in the endothelin-1 (ET-1) promoter [41]. This promoter was activated by GATA2 without Pit1 and this activity was enhanced by TRH/TRH-R1 (Fig. 2E, lower panel). Pit1-independent activation was also observed in the human  $\alpha$ GSU promoter, which has a typical GATA-RE [42] and is known to be stimulated by TRH in pituitary primary culture [4] and TPA [43,44]. Because this promoter contains two CREs close to GATA-RE, there may be cross talk between TRH/TRH-R signaling and PKA pathway. The GATA2-dependent activity of the human  $\alpha$ GSU promoter was enhanced by the treatment of forskolin in a dose dependent manner (Fig. 2F). The effect of co-stimulation with forskolin and TRH/TRH-R had additive but not synergistic effect.

### While inhibition by T3/TR is dominant over the activation by TRH, unliganded TR is not involved in TRH signaling

Using CV1 cells transfected with the expression plasmids for TRH-R1, GATA2, Pit1 and pituitary-specific TR, TR $\beta$ 2, we compared the potency of TRH-induced activation with T3/TR-dependent inhibition in the context of the TSH $\beta$  promoter. As shown above (Fig. 1C), 100 nM TRH is sufficient to enhance transactivation by Pit1 and GATA2, and this concentration is compatible with the previous reports using pituitary cells [4]. As we reported previously [29,33,34], T3/TR $\beta$ 2 efficiently inhibited GATA2/Pit1-dependent transactivation of TSH $\beta(-128/+37)$ -CAT stimulated by 100 nM TRH (Fig. 3A). T3/TR $\beta$ 2 also inhibited TPA-induced activity in the presence of Pit1 and GATA2 (Fig. 3B). TRH-induced activity of TSH $\beta$ -M1-mXmYmZ-CAT (Fig. 2A) with GATA2 was repressed by T3/TR $\beta$ 2 (Fig. 3C), indicating that inhibition by T3/TR $\beta$ 2 is dominant over TRH/GATA2-induced activation of the TSH $\beta$  promoter. If unliganded TR is a transcriptional activator of the TSH $\beta$  gene [22], it might play a role in transcriptional activation of the TSH $\beta$  gene by TRH [24,27]. As shown in Fig. 3D, unliganded TR $\beta$ 2 alone failed to stimulate basal or TRH-induced activity of the TSH $\beta$  promoter (lane 1, 2 and 5). Thus, unliganded TR $\beta$ 2 without Pit1 or GATA2 is not a mediator of TRH signaling in TSH $\beta$  gene regulation.

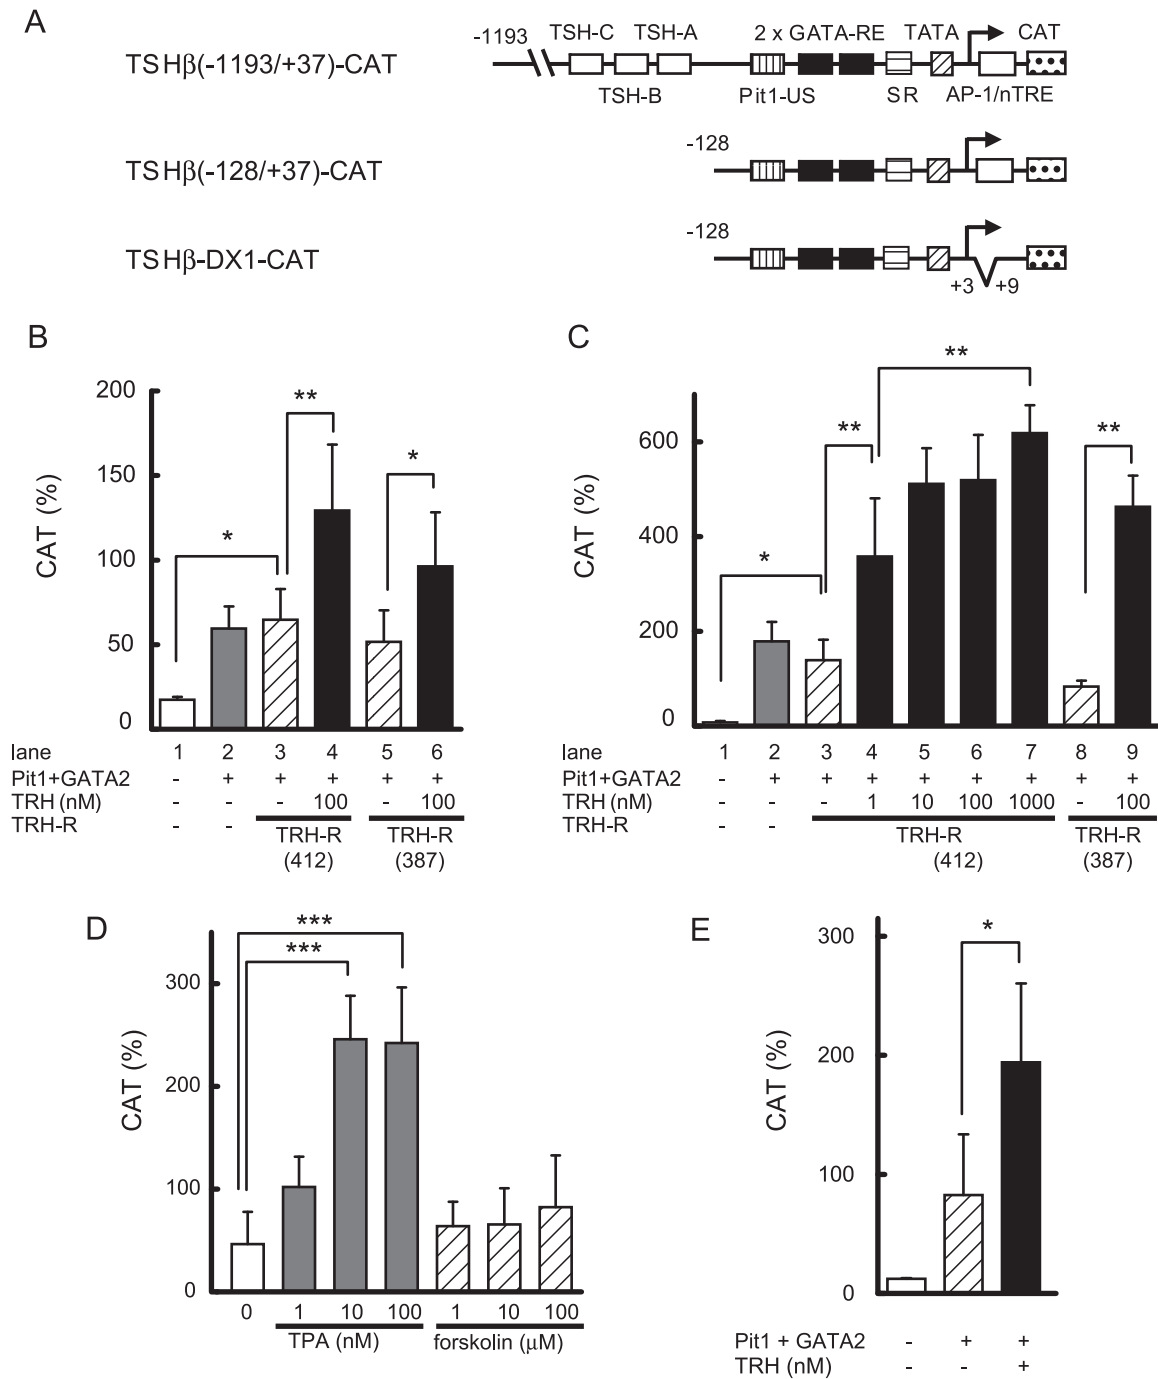

**Figure 1. TRH/TRH-R1 stimulates GATA2/Pit1-dependent activity of the human TSH $\beta$  gene.** (A) Schematics of TSH $\beta$ (-1193/+37)-, TSH $\beta$ (-128/+37)- and TSH $\beta$ -DX1-CAT. Putative TRH-responsive elements (TSH-A, nt. -274/-258 and TSH-C, nt. -402/-384) and PKA-sensitive element (TSH-B, nt. -333/-325) reported in the rat TSH $\beta$  gene are indicated as boxes in TSH $\beta$ (-1193/+37)-CAT. Pit1-US, a functional Pit1 binding site upstream of GATA-REs. GATA-REs, GATA responsive elements. SR, suppressor region. (B) and (C) Two  $\mu$ g TSH $\beta$ (-1193/+37)-CAT (B) or TSH $\beta$ (-128/+37)-CAT (C) was cotransfected into CV1 cells together with the expression plasmids for Pit1 (0.1  $\mu$ g), GATA2 (0.2  $\mu$ g), TRH-R1(412) or TRH-R1(387) (0.2  $\mu$ g) and  $\beta$ -galactosidase-based reporter gene (pCH111, 1.1  $\mu$ g). After 24h of culture, the cells were treated with 1–1000 nM TRH. (D) TPA, but not forskolin, enhances the Pit1/GATA2-dependent activity of TSH $\beta$ (-128/+37)-CAT. CV1 cells were cotransfected with 2.0  $\mu$ g of TSH $\beta$ (-128/+37)-CAT together with the expression plasmids for Pit1 (0.1  $\mu$ g), GATA2 (0.2  $\mu$ g), TRH-R1 (0.2  $\mu$ g; 412 aa or 387 aa) and pCH111 (1.1  $\mu$ g). After 24h of culture, the cells were treated with 1–100 nM TPA or 1–100  $\mu$ M forskolin. (E) AP-1-like sequence overlapping with putative nTRE is dispensable for TRH-induced activation of the TSH $\beta$  gene. Reporter assay with TSH $\beta$ -DX1-CAT was performed as described in (C). CAT activity was normalized with  $\beta$ -galactosidase activity. CAT activity for pCMV-CAT (5 ng/well) was taken as 100%. Data are expressed as the mean  $\pm$  S.D. of at least three independent experiments. \*,  $P < 0.05$ ; \*\*,  $P < 0.01$ ; \*\*\*,  $P < 0.001$ . doi:10.1371/journal.pone.0018667.g001

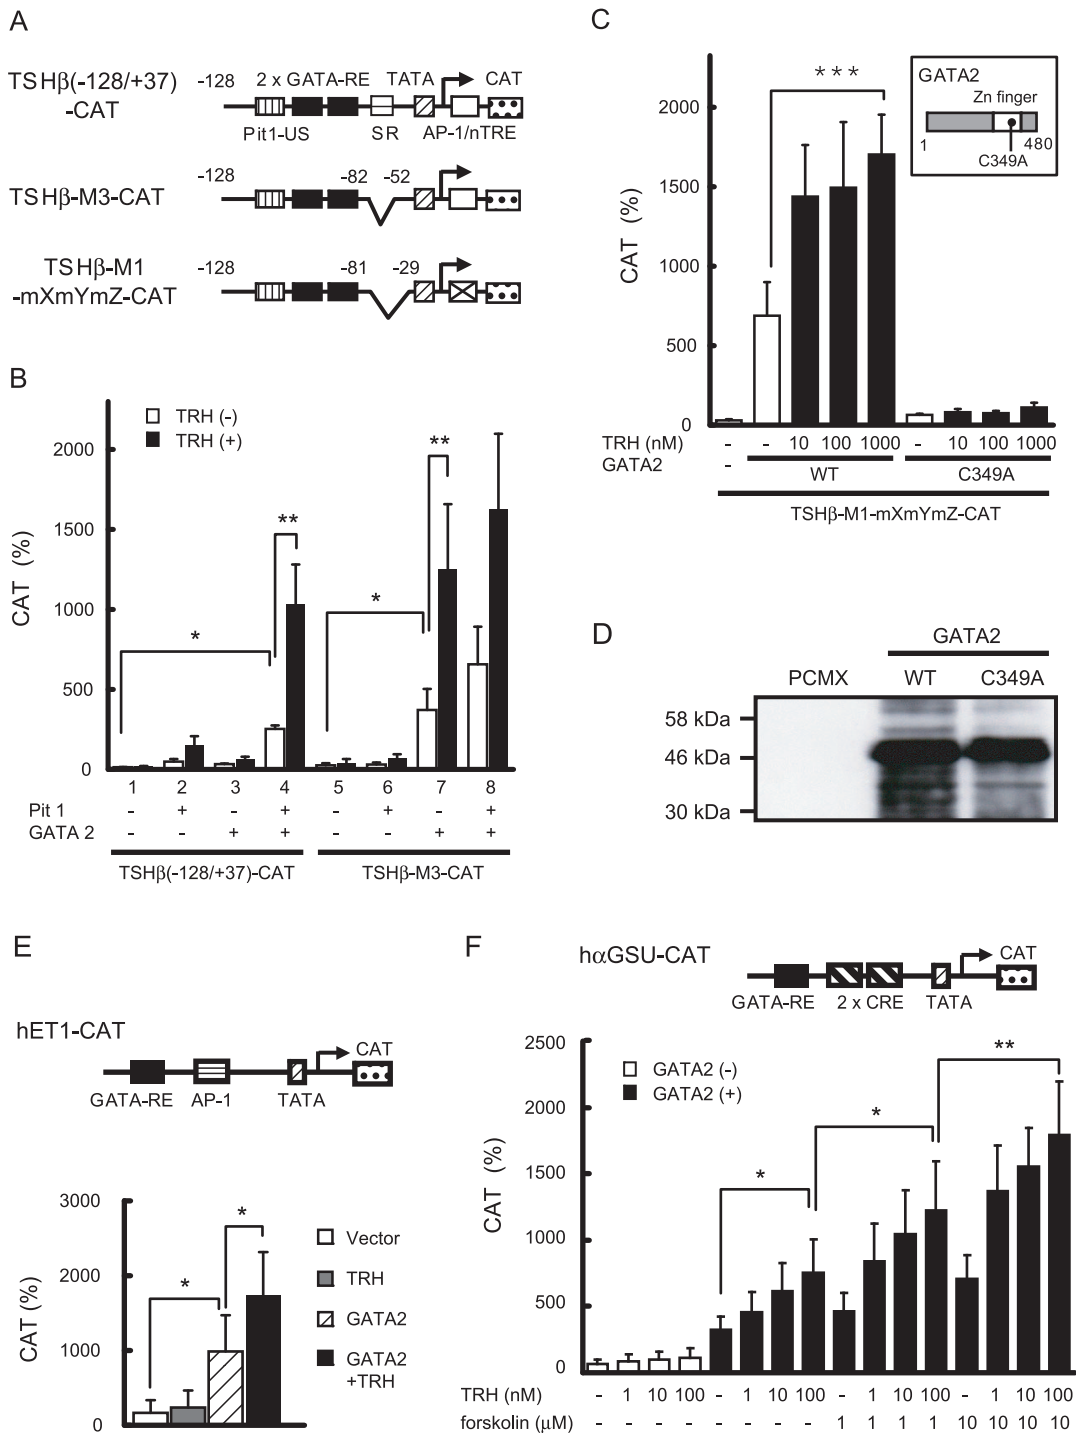

**Figure 2. GATA2 alone mediates TRH signaling for transcription of the SR-less TSH $\beta$  promoter.** (A) Schematics of TSH $\beta$ (-128/+37)-CAT, TSH $\beta$ -M3-CAT and TSH $\beta$ -M1-mXmYmZ-CAT. SR was deleted in both constructs and AP-1-like sequence/nTRE was mutated in TSH $\beta$ -M1-mXmYmZ-CAT. (B) and (C) Two  $\mu$ g TSH $\beta$ (-128/+37)-CAT, TSH $\beta$ -M3-CAT (B) and TSH $\beta$ -M1-mXmYmZ-CAT (C) were transfected into CV1 cells along with the expression plasmids for Pit1 (0.1  $\mu$ g), GATA2 (0.2  $\mu$ g), TRH-R1(412) (0.2  $\mu$ g), and pCH111 (1.1  $\mu$ g) in the presence or absence of 100 nM TRH. Basal and TRH-induced activities of TSH $\beta$ -M1-mXmYmZ-CAT were abolished with mutant GATA2, C349A (inset). (D) Expression level of wild-type GATA2 and C349A mutant. CV1 cells in 10 cm dish were transfected with an equal amount (10  $\mu$ g/dish) of expression plasmids for wild-type or mutant GATA2s. Whole cell extracts were fractionated by SDS-PAGE and subjected to Western blot with anti-GATA2 antibody. (E) Schematic representation of hET1-CAT (upper panel). Two  $\mu$ g of hET1-CAT was transfected into CV1 cells along with expression plasmids for GATA2 (0.2  $\mu$ g), TRH-R1(412) (0.2  $\mu$ g), and pCH111 (1.1  $\mu$ g) in the presence or absence of 100 nM TRH (lower panel). (F) Schematic representation of h $\alpha$ GSU-CAT (upper panel). Reporter assay was carried out as described in (E) in the presence or absence of 0–10  $\mu$ M forskolin (lower panel). CAT activity was normalized with  $\beta$ -galactosidase activity. CAT activity for pCMV-CAT (5 ng/well) was taken as 100%. Data are expressed as the mean  $\pm$  S.D. of at least three independent experiments. \*,  $P < 0.05$ ; \*\*,  $P < 0.01$ .

doi:10.1371/journal.pone.0018667.g002

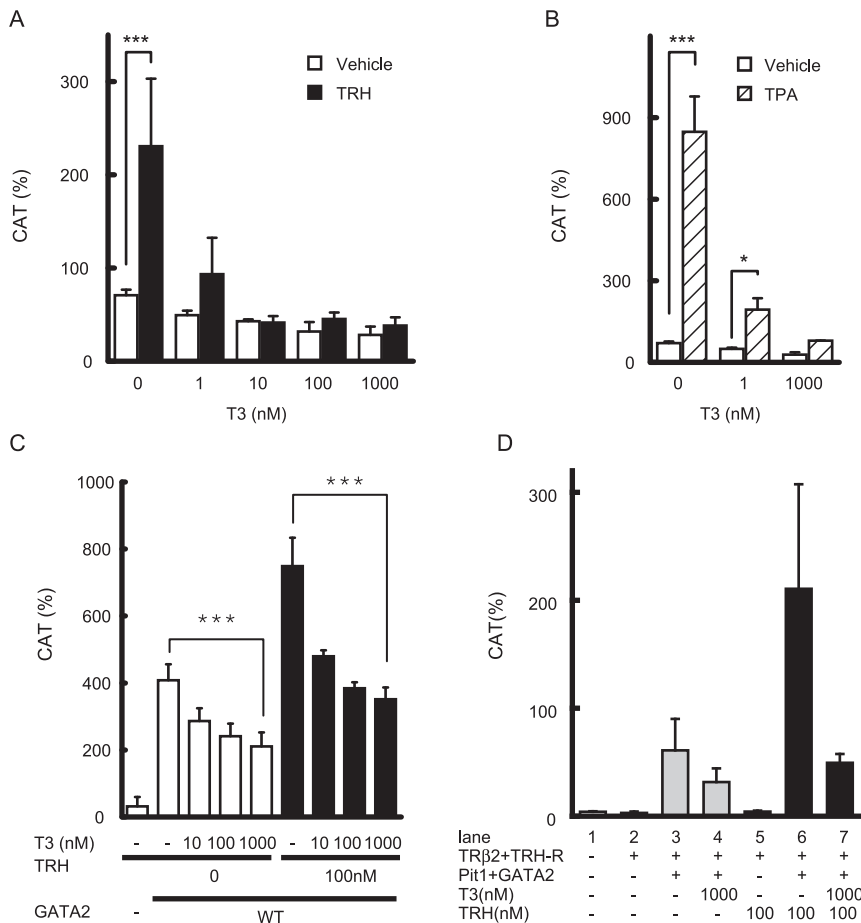

**Figure 3. Negative regulation by T3/TR $\beta$ 2 is dominant over the transcriptional activation induced by TRH/TRH-R1 or TPA.** (A) and (B) Two  $\mu$ g TSH $\beta$ (-128/+37)-CAT was transfected into CV1 cells along with expression plasmids for Pit1 (0.1  $\mu$ g), GATA2 (0.2  $\mu$ g), TRH-R1(412) (0.2  $\mu$ g), TR $\beta$ 2 (0.2  $\mu$ g) and pCH111 (1.1  $\mu$ g). After 24 h of culture, the cells were treated with 100 nM TRH (A) or 10 nM TPA (B) for an additional 24 h in the presence or absence of 1–1000 nM T3. (C) Two  $\mu$ g TSH $\beta$ -M1-mXmYmZ-CAT (Fig. 2A) was transfected into CV1 cells along with expression plasmids for GATA2 (0.2  $\mu$ g), TRH-R1(412) (0.2  $\mu$ g), TR $\beta$ 2 (0.2  $\mu$ g), and pCH111 (1.1  $\mu$ g). After 24 h of culture, the cells were treated with 100 nM TRH for an additional 24 h in the presence or absence of 1–1000 nM T3. (D) Unliganded TR $\beta$ 2 alone does not mediate TRH signaling. TSH $\beta$ (-128/+37)-CAT and expression plasmids for human TR $\beta$ 2 (0.2  $\mu$ g), TRH-R1(412) (0.2  $\mu$ g), and pCH111  $\beta$ (1.1  $\mu$ g) were transfected into CV1 cells along with or without the expression plasmids for Pit1 (0.1  $\mu$ g) and GATA2 (0.2  $\mu$ g). After 24 h of culture, the cells were treated with 100 nM TRH and/or 1000 nM T3 for an additional 24 h. CAT activity was normalized with  $\beta$ -galactosidase activity. CAT activity for pCMV-CAT (5 ng/well) was taken as 100%. Data are expressed as the mean  $\pm$  S.D. of three independent experiments. \*,  $P < 0.05$ ; \*\*,  $P < 0.01$ , \*\*\*,  $P < 0.001$ . doi:10.1371/journal.pone.0018667.g003

### Zn finger domain of GATA2 plays a pivotal role in mediating TRH signaling

The Zn finger domain of GATA2 (GATA2-Zf) has high sequence homology with those of GATA1 and 3 (Fig. 4A, left panel) and GATA3 partially compensates for GATA2 in pituitary-specific GATA2-knockout mice [35]. As shown in Fig. 4B, TPA enhanced the transactivation of TSH $\beta$ -M1-mXmYmZ-CAT (Fig. 2A) by GATA2 as well as GATA1 and 3 without Pit1. While TRH signaling was abolished by the mutation (C349A) in GATA2-Zf (Fig. 2C), the transcriptional activity of the deletion constructs that lack the N- or C-terminal region of GATA2 (Fig. 4A, right panel) was significantly stimulated by TPA (Fig. 4C), showing that GATA2-Zf is important for the activation by TRH/PKC signaling. Although phosphorylation of serine residue at codon 401 in human GATA2 was reported to increase its nuclear localization [45], substitution of the serines at codon 401 and 402 in the mouse GATA2 (Fig. 4A, left panel) with alanines did not affect the response to TPA (Fig. 4D). As shown in Fig. 4E, TPA

(10 nM) treatment did not alter the molecular weight of FLAG-tagged GATA2-Zf expressed in CV1 cells.

### TRH signaling facilitates the DNA binding capacity of GATA2

Because GATA2-Zf functions as an interface to recognize GATA-REs, we performed a gel shift assay to assess the effect of TRH on DNA binding of GATA2-Zf. CV1 cells were co-transfected with TRH-R1 and GATA2, and cultured with or without 100 nM TRH. The nuclear extracts were incubated with  $^{32}$ P-labeled DNA fragment harboring two GATA-REs in the TSH $\beta$  promoter (Fig. 5A). As we reported [31], two bands corresponding to GATA2 monomer and dimer were observed (Fig. 5B, lane 2). Interestingly, these bands were potentiated by TRH treatment (lane 3). These signals were abolished by the 50-fold specific competitor (lane 4) but not unrelated DNA (lane 5) and supershifted by a specific antibody against GATA2 (lane 6). Identical results were obtained in the nuclear extract from CV1

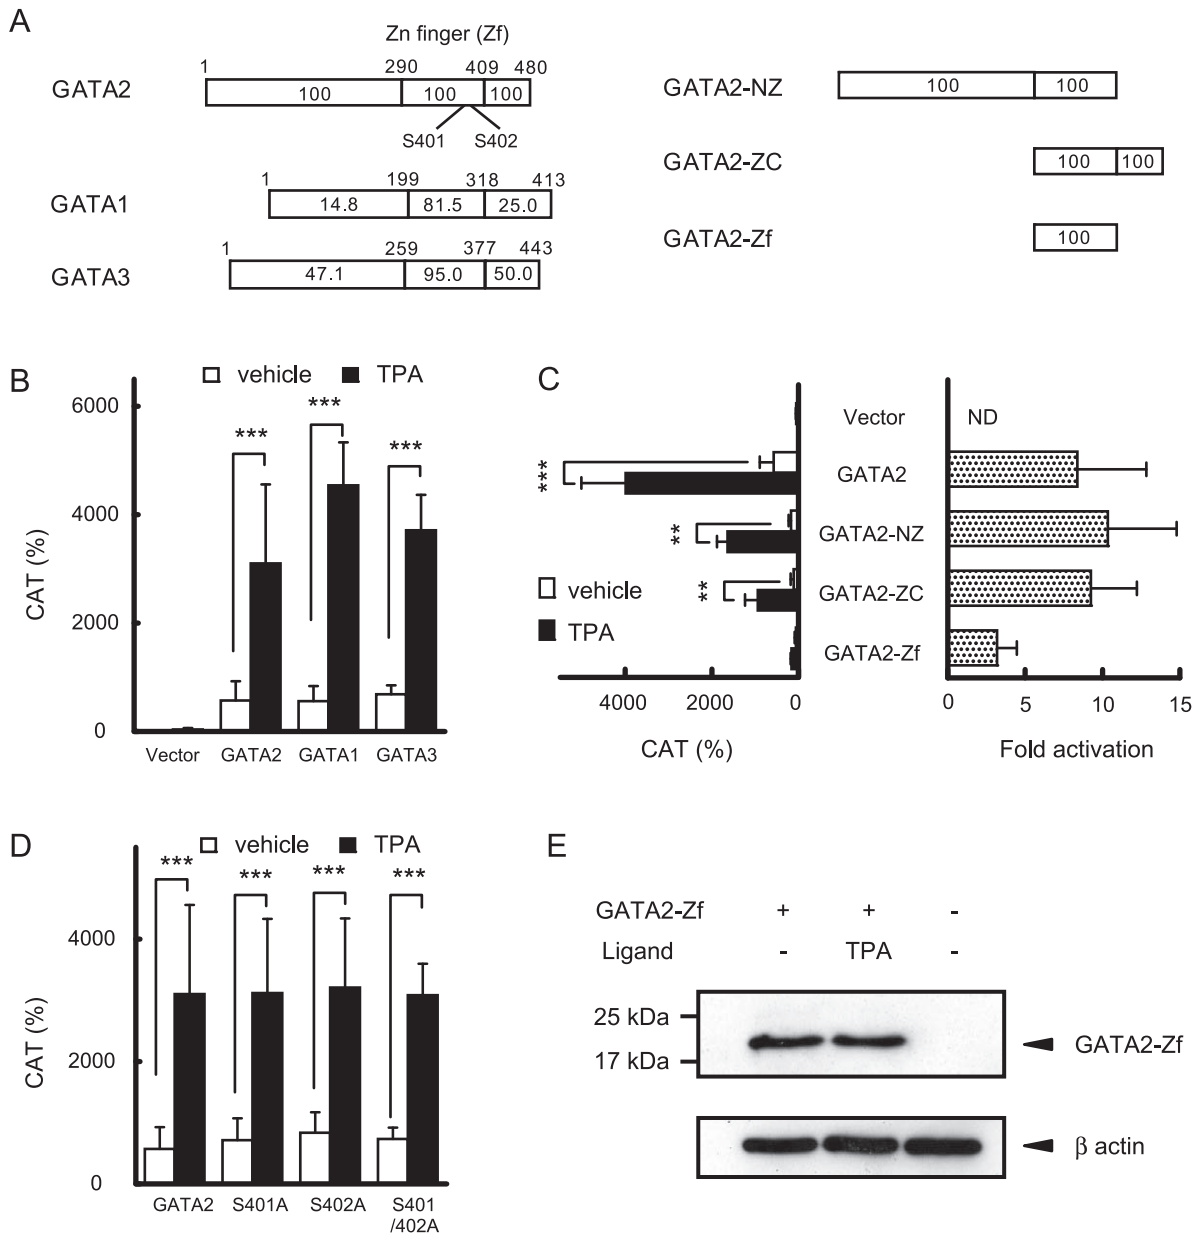

**Figure 4. GATA2-Zf mediates TRH/PKC signaling for the TSH $\beta$  promoter.** (A) Schematics of full-length GATA2, GATA1, GATA3, GATA2-NZ, ZC and Zf. Homology of amino acids between GATA3 and 1 relative to GATA2 is indicated as a percentage in boxes. (B) and (C) TSH $\beta$ -M1-mXmYmZ-CAT (2.0  $\mu$ g, Fig. 2A), and pCH111 (1.1  $\mu$ g) were cotransfected into CV1 cells with various GATA2 mutants (0.2  $\mu$ g) with or without 10 nM TPA (left panel). CAT activity was normalized with  $\beta$ -galactosidase activity. (D) Alanine substitutions with serines at codons 401 or 402 in mouse GATA2-Zf did not affect TRH-induced activation. Reporter assay was carried out as described in (B) and (C). CAT activity for pCMV-CAT (5 ng/well) was taken as 100%. The fold activation (right panel) was calculated from CAT activity with TPA divided by that without TPA. ND, not determined. Data are expressed as the mean  $\pm$  S.D. of at least three independent experiments. \*\*,  $P < 0.01$ ; \*\*\*,  $P < 0.001$ . (E) CV1 cells were cotransfected with FLAG-tagged GATA2 expression plasmid and were treated with 10 nM TPA. Whole cell extracts were resolved by SDS/PAGE and western blot analyses for GATA2-Zf and  $\beta$ -actin were performed using the anti-FLAG and anti- $\beta$ -actin antibodies, respectively.  
doi:10.1371/journal.pone.0018667.g004

cells cultured with TPA (Fig. 5C). The expression level of GATA2 in CV1 cells was not affected by treatment with TRH or TPA (Fig. 5D). Collectively, TRH/PKC signal facilitates the DNA binding of GATA2 in the TSH $\beta$  promoter.

#### TRH signaling in somato-lactotroph cell line, GH3, transfected with GATA2 gene

GH3 is a somato-lactotroph cell line expressing endogenous TRH-R1(412) [8] and Pit1 but not GATA2 [30]. In this regard,

GH3 cells provide a suitable experimental system to explore the function of GATA2. Because of the low transfection efficiency of GH3 cells, we fused the hRluc-based reporter gene with human TSH $\beta$  promoters to generate TSH $\beta$ (-1193/+37)- or TSH $\beta$ (-128/+37)-hRluc (Fig. 6A). Although GH3 cells express endogenous Pit1, the transcriptional activity of TSH $\beta$ (-1193/+37)-hRluc was very low (Fig. 6B, lane 1), presumably due to the lack of GATA2. While TRH treatment modestly activated the TSH $\beta$  promoter in GH3 cells via endogenous TRH-R1 (lane 2)



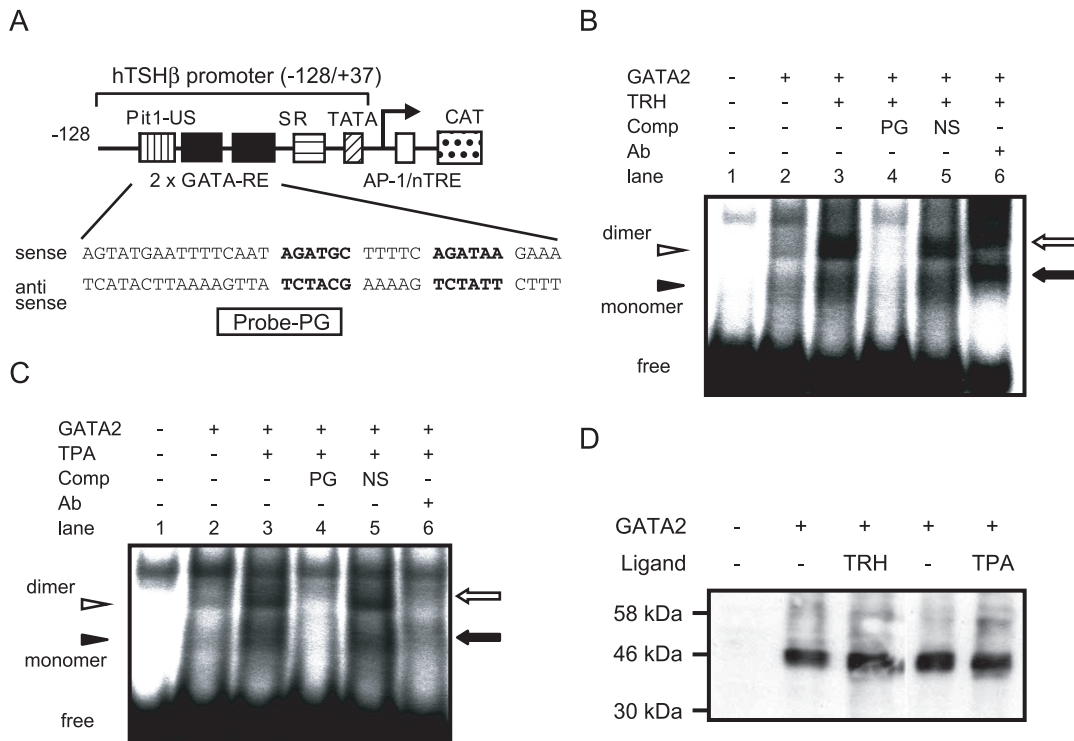

**Figure 5. Treatment with TRH and TPA enhance DNA binding of GATA2.** (A) Schematic of probe-PG that has two GATA-REs. (B) and (C) CV1 cells were cotransfected with GATA2 and TRH-R1(412) expression plasmids and were treated with 100 nM TRH (B) or 10 nM TPA (C). NE from CV1 cells (2  $\mu$ g) was incubated with  $\gamma$ -<sup>32</sup>P-labeled probe-PG. DNA-protein complexes were resolved by electrophoresis on a 5% polyacrylamide gel. Solid arrowhead, GATA2 monomer; open arrowhead, GATA2 dimer. Solid and open arrows on the right indicate the supershifts of GATA2 monomer and dimer, respectively. Ab, anti-GATA2 antibody; PG, cold probe-PG; NS, non-specific oligonucleotide; free, free radiolabeled probe-PG. (D) Western blot analysis was performed using the anti-GATA2 antibody. NEs of CV1 cells (10  $\mu$ g) described in (B) and (C) were resolved by SDS/PAGE (10% gel). Molecular weight markers are shown on the left. doi:10.1371/journal.pone.0018667.g005

[40], transcription in the presence of GATA2 was further enhanced by TRH treatment (lane 3 and 4). In TSH $\beta$ (-128/+37)-hRluc, GATA2-dependent activation was also potentiated by TRH (Fig. 6C, lane 3 and 4). Although disruption of Pit1-US is known to abolish the activity of the TSH $\beta$  promoter [31,46], deletion of SR enables GATA2 to re-activate transcription without Pit1 [31]. As predicted, TRH-induced GATA2 activity was maintained in TSH $\beta$ -mP-M1-hRluc, where Pit1-US was mutated and SR was deleted (Fig. 6A and D). In TSH $\beta$ (-128/+37)-hRluc, TRH induced some activity without co-expression of GATA2 (Fig. 6C, lane 1 and 2), but Pit1 is unlikely to mediate this activity since similar TRH-induced activity was observed in TSH $\beta$ -mP-M1-hRluc (Fig. 6D), where a functional Pit binding site, Pit1-US, was mutated. These results suggest again that Pit1 is not the direct target of TRH signaling.

#### TRH/GATA2-induced transactivation of TSH $\beta$ gene is independent of MAPK signaling

As shown in Fig. 6E, a PKC inhibitor, staurosporin, reduced the TRH-induced activity of TSH $\beta$ (-128/+37)-hRluc in GH3 cells co-transfected with GATA2. In this cell line, PKC is known to stimulate the mitogen-activated protein kinase (MAPK) pathway [9], resulting in activation of the PRL promoter via the Ets family transcription factor [47]. Consistently, TRH treatment stimulated the activity of PRL-Luc, where the PRL promoter was fused with the luciferase gene (Fig. 6F). We speculated that the role of MAPK may be different between the TSH $\beta$  gene and the PRL gene if

TRH signaling in the former gene is mediated by GATA2 but not Ets. While MAPK inhibitors, U0126 and SB202190, abolished the stimulatory effect of TRH on PRL-Luc (Fig. 6F), the TRH-induced activity of GATA2 in TSH $\beta$ (-128/+37)-hRluc was resistant to these compounds (Fig. 6G). Similar results were observed when we used a c-Jun N-terminal kinase inhibitor, SP600125 (data not shown).

#### GATA2 is the limiting factor for the TRH signaling in thyrotroph cell line, T $\alpha$ T1

T $\alpha$ T1 cells were regarded as a thyrotroph cell line [48] and reported to express endogenous Pit1, TR $\beta$ 2 [36] and (presumably) TRH-R [49]. Western blotting with anti-GATA2 antibody revealed that the expression level of GATA2 in this cell line is low and similar to that in HeLa cells (Fig. 7A)[50]. We previously found that, in HeLa cells, co-expression of GATA2 as well as Pit1 was required for the reporter assay with TSH $\beta$ (-128/+37)-CAT (data not shown). In a reporter assay with TSH $\beta$ (-128/+37)-hRluc (Fig. 7B) in T $\alpha$ T1 cells, the effect of 100 nM TRH treatment exhibited minimal induction (Fig. 7C, lane 2) and transient transfection of GATA2 permitted significant enhancement by TRH (Fig. 7C, lane 3 and 4). This suggested that GATA2 is a limiting factor for TRH signaling. We tested TSH $\beta$ -G2C-hRluc, where downstream GATA-RE was mutated (Fig. 7B). Although this construct harbors intact Pit1-US, induction by TRH was abolished (Fig. 7C, lane 7 and 8), suggesting that GATA2 is essential for TRH-induced activation of the TSH $\beta$  gene in T $\alpha$ T1 cells.



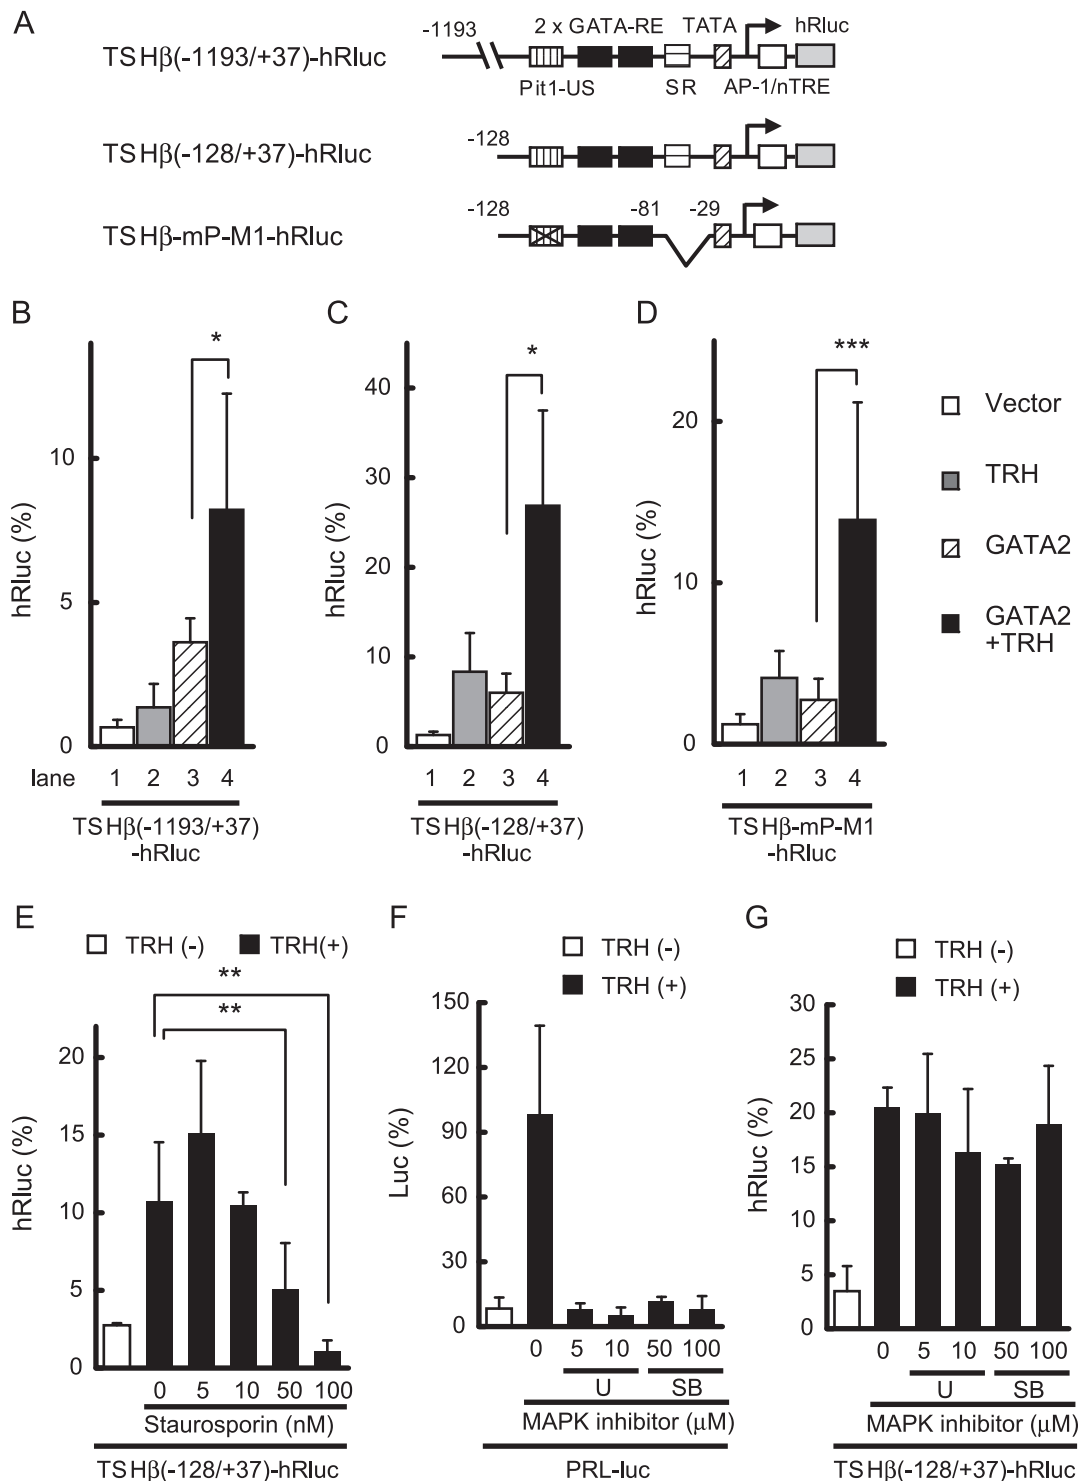

**Figure 6. Pit1-US is dispensable for TRH signaling in the SR-less TSH $\beta$  promoter in pituitary-derived GH3 cells transfected with GATA2.** (A) Schematics of TSH $\beta$ (-1193/+37)-hRluc, TSH $\beta$ (-128/+37)-hRluc, and TSH $\beta$ -mP-M1-hRluc. In TSH $\beta$ -mP-M1-hRluc, Pit1-US was mutated and SR was deleted. (B) and (C) Co-transfection of GATA2 allows TRH/TRH-R1 to activate TSH $\beta$ (-1193/+37)-hRluc (B) and TSH $\beta$ (-128/+37)-hRluc (C). (D) Although Pit1-US is mutated in TSH $\beta$ -mP-M1-hRluc, deletion of SR enabled GATA2 to activate transcription. Using lipofection, 0.4  $\mu$ g TSH $\beta$ (-1193/+37)-hRluc (B), TSH $\beta$ (-128/+37)-hRluc (C), or TSH $\beta$ -mP-M1-hRluc (D) was cotransfected into GH3 cells together with the expression plasmid for GATA2 (0.05  $\mu$ g) and pGL4.13[luc2/SV40] (0.05  $\mu$ g). After 5 h of culture, the cells were treated with 100 nM TRH for 12 h. hRluc activity was normalized with firefly luciferase activity of pGL4.13[luc2/SV40]. (E) GH3 cells were cotransfected with TSH $\beta$ (-128/+37)-hRluc (0.45  $\mu$ g) and GATA2 expression plasmid (0.05  $\mu$ g). After 5 h culture, cells were treated with 100 nM TRH for 12 h in the presence or absence of PKC inhibitor, staurosporin (5–100 nM). hRluc activity was normalized with protein concentration. (F) GH3 cells were cotransfected with PRL-luc plasmid (0.5  $\mu$ g) and treated with 100 nM TRH for 12 h with or without MAPK inhibitor, U0126 (5–10  $\mu$ M) or SB202190 (50–100  $\mu$ M). Firefly luciferase activity was normalized with protein concentration. (G) TRH/GATA2-induced activation of the TSH $\beta$  promoter depends on PKC but not MAPK in GH3 cells. GH3

cells were cotransfected as described in (E). After 5 h culture, the cells were treated with 100 nM TRH for 12 h with or without U0126 (5–10  $\mu$ M), or SB202190 (50–100  $\mu$ M). The magnitude of hRluc activity for pGL4.74 [hRluc/TK] or firefly luciferase activity for pGL4.13 [luc2/SV40] (50 ng/well) was taken as 100%. Data are expressed as the mean  $\pm$  S.D. of at least three independent experiments. U, U0126; SB, SB202190; \*,  $P < 0.05$ ; \*\*,  $P < 0.01$ ; \*\*\*,  $P < 0.001$ .

doi:10.1371/journal.pone.0018667.g006

## Discussion

We reported previously that the true transcriptional activator of the TSH $\beta$  gene is GATA2, not Pit1 [31] or unliganded TR [29]. Here, we demonstrated that GATA2 is the principal mediator of TRH signaling for TSH $\beta$  expression. TRH-induced activity is abolished by amino acid substitution in the GATA2-Zn finger domain (C349A, Fig. 2C). TRH signal stimulates GATA2-dependent activities of the  $\alpha$ GSU gene and the ET-1 gene (Fig. 2E and F). In agreement with previous reports [17–19], the current work provides additional lines of evidence that the Pit1 or Pit1-CBP/p300 complex is not the main target of TRH signaling. First, GATA2 is sufficient and Pit1 is dispensable for TRH-induced activation of the TSH $\beta$  promoter when SR was deleted (Fig. 2B and 6D). Second, Pit1 in T $\alpha$ T1 cells [36] failed to mediate the TRH signal in TSH $\beta$ -G2C-hRluc, which has intact Pit1-US but harbors a mutation in GATA-RE (Fig. 7B and C). Third, although Pit1 may be phosphorylated [15,16,20], substitution of candidate amino acids with alanines did not affect transcriptional activity of the TSH $\beta$  gene (data not shown), as in the PRL gene [21,47]. We reported that the function of Pit1 does not have conventional synergism with GATA2, but rather protects GATA2 function from SR-induced suppression (depression).

Kim et al. [49] reported that the TRH signal may induce the expression of a transcription factor, Lhx2, in T $\alpha$ T1 cells. According to the authors, Lhx2 subsequently binds the DNA sequence (nt. –86/–68 in the rat TSH $\beta$  gene) that overlaps with SR, and activates the TSH $\beta$  promoter even in  $\alpha$ TSH cells, which lack endogenous Pit1 [17,49]; however, their findings were not compatible with reduced TSH $\beta$  expression in a CPHD patient with mutant Pit1 [11]. Although they reported that Lhx2 also activates the TSH $\beta$  promoter in GH3 cells, which lacks endogenous GATA2, this does not agree with our finding that the mutation of GATA-RE abolished the transactivation by TRH in T $\alpha$ T1 cells (Fig. 7C). We could not detect the activation of the human TSH $\beta$  promoter (TSH $\beta$ (–128/+37)-CAT) by co-transfection of the Lhx2 expression plasmid into CV1 cells (data not shown).

TRH/TRH-R-induced PKC activity is known to stimulate MAPK activity [9,51] and MAPK subsequently phosphorylates Ets transcription factors and activates the PRL gene [47]. Of note, phosphorylation by MAPK does not affect the functions of GATA2 [52] and the transactivation domain of Pit1 [53]. The current study using GH3 cells transfected with GATA2 indicates that TRH/GATA2/Pit1-induced activation of the TSH $\beta$  promoter depends on PKC (Fig. 6E) but not MAPK (Fig. 6G). To our knowledge, this is the first report showing the difference in the TRH signaling pathway between the TSH $\beta$  gene and the PRL

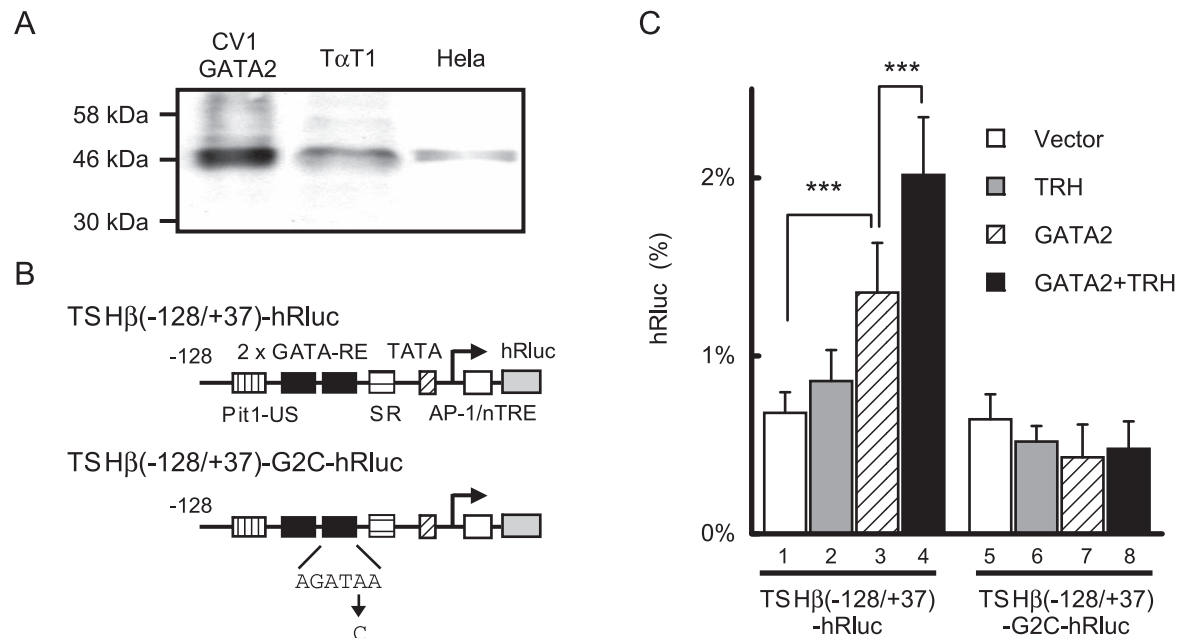

**Figure 7. GATA2 is a limiting factor for TRH-induced transactivation of the TSH $\beta$  gene in T $\alpha$ T1 cells.** (A) Expression of endogenous GATA2 in thyrotroph-derived cell line, T $\alpha$ T1 is comparable with that of HeLa cells. Whole cell extracts of CV1 cells transfected with GATA2 expression plasmid (lane 1), T $\alpha$ T1 cells (lane 2) and HeLa cells (lane 3) were fractionated by SDS-PAGE and subjected to Western blot with anti-GATA2 antibody. (B) Schematic representations of TSH $\beta$ (–128/+37)-hRluc and TSH $\beta$ (–128/+37)-G2C-hRluc. Downstream GATA-RE was mutated in TSH $\beta$ (–128/+37)-G2C-hRluc. (C) Co-transfection of GATA2 enables TRH to activate the TSH $\beta$  promoter (lane 1–4). GATA2-dependent as well as TRH-induced transcriptional activations were abolished by the mutation of GATA-RE (lane 5–8). T $\alpha$ T1 cells were cotransfected with TSH $\beta$ (–128/+37)-hRluc (0.45  $\mu$ g) or TSH $\beta$ (–128/+37)-G2C-hRluc along with GATA2 expression plasmid (0.05  $\mu$ g). After 5 h culture, the cells were treated with 100 nM TRH for 12 h. hRluc activity was normalized with the activity of pCMV- $\beta$ gal. The magnitude of hRluc activity for pGL4.74 [hRluc/TK] (50 ng/well) was taken as 100%. Data are expressed as the mean  $\pm$  S.D. of at least three independent experiments. \*\*\*,  $P < 0.005$ .

doi:10.1371/journal.pone.0018667.g007

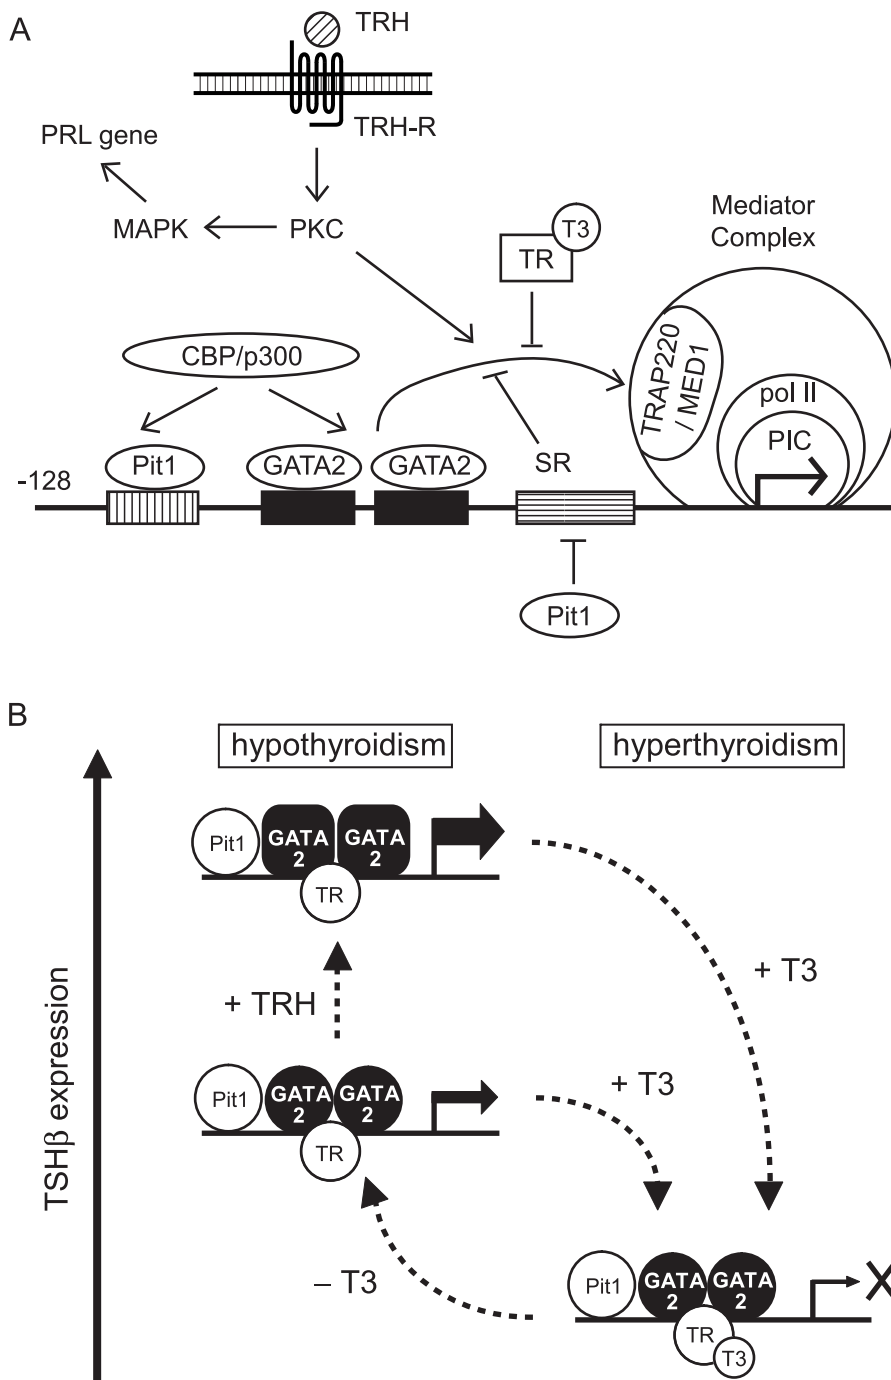

**Figure 8. Mechanism of TRH-induced transactivation of the TSH $\beta$  gene.** (A) GATA2 plays a pivotal role in both TRH-induced activation as well as T3/TR-dependent inhibition. Unlike the PRL gene, transactivation of the TSH $\beta$  gene is independent of the MAPK pathway. Pit1 competes the binding of SR binding protein and protects the function of GATA2 from inhibition and also binds to Pit1-US to cooperate with GATA2s to recruit a coactivator, CBP/p300. PIC, pre-initiation complex. Pol II, RNA polymerase II. (B) Roles of GATA2, Pit1 and TR in hypo- and hyper-thyroidism. Co-expression of GATA2 and Pit1 determines thyrotroph differentiation. With support by Pit1, GATA2 maintains the basal transcription of the TSH $\beta$  gene and mediates TRH/TRH-R1 signaling in hypothyroidism while unliganded TR alone is not a transcriptional activator. Inhibition by T3/TR is dominant over the activation by GATA2 even in the presence of TRH signaling. doi:10.1371/journal.pone.0018667.g008

gene. Whereas cAMP is known to activate the TSH $\beta$  gene [5,13] and Pit1-CBP/p300 complex plays a role in TSH $\beta$  expression [23,31,40], activation of GATA2 by TRH is independent of the PKA pathway because transactivation of the TSH $\beta$  promoter in the presence of Pit1 and GATA2 was not enhanced by forskolin

(Fig. 1D) or did not require a putative cAMP-sensitive site, TSH-B (Fig. 1C). This is in agreement with previous *in vivo* studies [8,51,54,55].

GATA2-NZ and ZC partially mediate TRH-induced transactivation (Fig. 4C) while mutation of GATA2 (C349A) abolished it

(Fig. 2C), suggesting the crucial role of GATA2-Zf in TRH signaling. Although the detailed mechanism of how GATA2-Zf mediates TRH signaling is unknown, there are the following possibilities. First, stimulation by TRH/TRH-R1 or TPA enhanced the DNA binding capacity of GATA2, as shown in our gel shift assay (Fig. 5). Similar effects of PKC were reported in the GATA-REs of vascular adhesion molecule-1 promoter [56] and in the human  $\alpha$ GSU gene [43]. Second, phosphorylation of serine at codon 401 in GATA2-Zf (Fig. 4A) may facilitate the nuclear localization of GATA2 [45]. In our experimental condition, however, the substitution of serines at codon 401 or 402 with alanines did not cripple the TPA effect (Fig. 4D). As reported previously [57], the effect of the phosphorylation of these serine residues may be specific to the promoter context. Finally, TRAP220/MED1 plays an important role (Fig. 8A). TSH $\beta$  expression was reduced in heterozygous TRAP220/MED1-deficient mice [58] and GATA2-Zf interacted with TRAP220/MED1 [59]. Our preliminary data showed that GATA2-dependent activation of the TSH $\beta$  promoter by TRH signaling is also mediated by TRAP220/MED1 (data not shown). Because TRAP220/MED1 contains multiple amino acid sequences which can be phosphorylated by various kinases, including PKC [60,61], its phosphorylation may be involved in the TRH signaling pathway.

Unexpectedly, we found that the GATA2 expression level in T $\alpha$ T1 cells is insufficient for TRH-induced activation (Fig. 7C) and failed to detect in vivo binding of GATA2 to the TSH $\beta$  promoter in this cell line (data not shown). Although T $\alpha$ T1 was established from transgenic mice harboring SV40-large T antigen fused with the  $\alpha$ GSU promoter [36,48], high and sustained expression of GATA2 may increase the amount of SV40-large T antigen (Fig. 2F), resulting in phenotype alteration with limited GATA2 expression. Forced expression of GATA2 in T $\alpha$ T1 cells enabled the wild-type TSH $\beta$  gene to be activated by TRH stimulation (Fig. 7C, left panel), indicating that GATA2 is a limiting factor for the TRH signaling in this cell line.

Although genetic ablation of H-P-T axis-related genes has been tested [24,28,62] and pituitary-specific GATA2-knockout mice established [35], the relative contributions of TRH signaling and negative feedback by T3 in TSH $\beta$  expression have not been clarified at the molecular level. We found that T3/TR $\beta$ 2 rigorously inhibits GATA2-dependent activity enhanced by TRH or TPA (Fig. 3), suggesting that, with high T3 concentration, repression by T3/TR is dominant over the effect of TRH signaling (Fig. 8B). This is compatible with the recent report comparing Pax8-null mice with Pax8/TRH-R1 double knockout mice [62] and the previous study that administration of TRH failed to stimulate TSH $\beta$  synthesis in a subject with overt thyrotoxicosis [63]. Our prior report suggests that T3-dependent

interaction of TR with TRAP220/MED1 may interfere with the function of GATA2 [33] (Fig. 8A). TRAP220/MED1 is a constituent of the Mediator complex that directly regulates the function of RNA polymerase II (pol II) [64]. Given that inhibition by T3 targets the final process of GATA2-induced transactivation, i.e. TRAP220/MED1-pol II complex, repression might occur downstream of or in the same step as TRH-induced activation.

It should be noted that release of the suppression by T3/TR is necessary but not sufficient for TSH $\beta$  expression. In hypothyroidism, the majority of TR $\beta$ 2 in thyrotroph is unliganded and TRH production in the hypothalamus is increased [65] (Fig. 8B). Nikrodhanond et al. [24] compared TSH production among wild-type, TR $\beta$ -knockout and TRH/TR $\beta$ -double knockout mice under hypothyroid conditions and made two important findings. First, TR $\beta$ -knockout mice and wild-type mice exhibited comparable TSH $\beta$  expression in hypothyroidism where TRH secretion from the hypothalamus is elevated [65]. This supports our finding that unliganded TR $\beta$  is not essential for TRH-induced TSH $\beta$  expression (Fig. 3D, lane 2 and 5). Second, TSH level in hypothyroidism was severely impaired in TRH/TR $\beta$ -double knockout mice compared with wild-type or TR $\beta$ -knockout mice, suggesting that elevation of TSH $\beta$  expression requires the TRH signal even when inhibition by T3/TR is released (Fig. 8B). We found here that the factor mediating TRH signal for TSH $\beta$  expression is GATA2 (Fig. 2C, 3D and 7C). This is supported by the report that pituitary-specific GATA2-knockout mice exhibit reduced TSH $\beta$  expression in hypothyroidism, where stimulation by TRH should be elevated [35]. As shown in Fig. 8B, GATA2 mediates not only the negative regulation by T3/TR [33] but also TRH-induced activation of the TSH $\beta$  gene.

## Acknowledgments

We are grateful to the following researchers for providing plasmids: Drs. Kazuhiko Umesono (Kyoto University, Japan), Masayuki Yamamoto (Tsukuba University, Japan), Keita Tatsumi (Osaka University, Japan), Yasuhiko Okimura (Kobe University, Japan), Yukio Kato (Meiji University) and Francisco Barros (Universidad de Oviedo, Spain). We also thank Drs. Takashi Minami, Takao Hamakubo and Tatsuhiko Kodama (University of Tokyo) for providing anti-GATA2 antibody and Dr. Pamela. L. Mellon (University of California, San Diego, CA) for T $\alpha$ T1 cells.

## Author Contributions

Conceived and designed the experiments: KO S. Sasaki YO HN. Performed the experiments: KO AM HI H. Matsunaga S. Suzuki H. Misawa KI. Analyzed the data: KO S. Sasaki. Contributed reagents/materials/analysis tools: KO S. Sasaki H. Misawa KI. Wrote the paper: KO S. Sasaki HN.

## References

- Shupnik MA (2000) Thyroid hormone suppression of pituitary hormone gene expression. *Rev Endocr Metab Disord* 1: 35–42.
- Sarapura VD, Samuels MH, Ridgway EC (2002) Thyroid-stimulating Hormone. In: Melmed S, ed. *The Pituitary*, Second Edition. Chichester: Wiley-Blackwell. pp 172–215.
- Zhu X, Gleiberman AS, Rosenfeld MG (2007) Molecular physiology of pituitary development: signaling and transcriptional networks. *Physiol Rev* 87: 933–963.
- Shupnik MA, Greenspan SL, Ridgway EC (1986) Transcriptional regulation of thyrotropin subunit genes by thyrotropin-releasing hormone and dopamine in pituitary cell culture. *J Biol Chem* 261: 12675–12679.
- Franklyn JA, Wilson M, Davis JR, Ramsden DB, Docherty K, et al. (1986) Demonstration of thyrotrophin beta-subunit messenger RNA in rat pituitary cells in primary culture—evidence for regulation by thyrotrophin-releasing hormone and forskolin. *J Endocrinol* 111: R1–2.
- Shibusawa N, Yamada M, Hirato J, Monden T, Satoh T, et al. (2000) Requirement of thyrotropin-releasing hormone for the postnatal functions of pituitary thyrotrophs: ontogeny study of congenital tertiary hypothyroidism in mice. *Mol Endocrinol* 14: 137–146.
- Rabeiler R, Mittag J, Geffers L, Ruther U, Leites M, et al. (2004) Generation of thyrotropin-releasing hormone receptor 1-deficient mice as an animal model of central hypothyroidism. *Mol Endocrinol* 18: 1450–1460.
- Kim GD, Carr IC, Anderson LA, Zabavnik J, Eide KA, et al. (1994) The long isoform of the rat thyrotropin-releasing hormone receptor down-regulates Gq proteins. *J Biol Chem* 269: 19933–19940.
- Sun Y, Lu X, Gershengorn MC (2003) Thyrotropin-releasing hormone receptors – similarities and differences. *J Mol Endocrinol* 30: 87–97.
- Jinsi-Parimoo A, Gershengorn MC (1997) Constitutive activity of native thyrotropin-releasing hormone receptors revealed using a protein kinase C-responsive reporter gene. *Endocrinology* 138: 1471–1475.
- Cohen LE, Radovick S (2002) Molecular basis of combined pituitary hormone deficiencies. *Endocr Rev* 23: 431–442.

12. Tashjian AH, Jr., Yasumura Y, Levine L, Sato GH, Parker ML (1968) Establishment of clonal strains of rat pituitary tumor cells that secrete growth hormone. *Endocrinology* 82: 342–352.
13. Shupnik MA, Rosenzweig BA, Showers MO (1990) Interactions of thyrotropin-releasing hormone, phorbol ester, and forskolin-sensitive regions of the rat thyrotropin-beta gene. *Mol Endocrinol* 4: 829–836.
14. Mason ME, Friend KE, Copper J, Shupnik MA (1993) Pit-1/GHF-1 binds to TRH-sensitive regions of the rat thyrotropin beta gene. *Biochemistry* 32: 8932–8938.
15. Steinfelder HJ, Radovick S, Mroczynski MA, Hauser P, McClaskey JH, et al. (1992) Role of a pituitary-specific transcription factor (pit-1/GHF-1) or a closely related protein in cAMP regulation of human thyrotropin-beta subunit gene expression. *J Clin Invest* 89: 409–419.
16. Steinfelder HJ, Radovick S, Wondisford FE (1992) Hormonal regulation of the thyrotropin beta-subunit gene by phosphorylation of the pituitary-specific transcription factor Pit-1. *Proc Natl Acad Sci U S A* 89: 5942–5945.
17. Gordon DF, Haugen BR, Sarapura VD, Nelson AR, Wood WM, et al. (1993) Analysis of Pit-1 in regulating mouse TSH beta promoter activity in thyrotropes. *Mol Cell Endocrinol* 96: 75–84.
18. Shupnik MA, Weck J, Hinkle PM (1996) Thyrotropin (TSH)-releasing hormone stimulates TSH beta promoter activity by two distinct mechanisms involving calcium influx through L type Ca<sup>2+</sup> channels and protein kinase C. *Mol Endocrinol* 10: 90–99.
19. Howard PW, Maurer RA (1994) Thyrotropin releasing hormone stimulates transient phosphorylation of the tissue-specific transcription factor, Pit-1. *J Biol Chem* 269: 28662–28669.
20. Kapiloff MS, Farkash Y, Wegner M, Rosenfeld MG (1991) Variable effects of phosphorylation of Pit-1 dictated by the DNA response elements. *Science* 253: 786–789.
21. Okimura Y, Howard PW, Maurer RA (1994) Pit-1 binding sites mediate transcriptional responses to cyclic adenosine 3',5'-monophosphate through a mechanism that does not require inducible phosphorylation of Pit-1. *Mol Endocrinol* 8: 1559–1565.
22. Wondisford FE, Farr EA, Radovick S, Steinfelder HJ, Moates JM, et al. (1989) Thyroid hormone inhibition of human thyrotropin beta-subunit gene expression is mediated by a cis-acting element located in the first exon. *J Biol Chem* 264: 14601–14604.
23. Cohen RN, Wondisford FE (2005) Factors that control thyroid function: Thyrotropin. In: Braverman LE, Utiger RD, eds. *Werner and Ingbar's: the Thyroid. A Fundamental and Clinical Text*, Ninth Edition. Philadelphia: Lippincott Williams & Wilkins. pp 159–197.
24. Nikrodhanond AA, Ortega-Carvalho TM, Shibusawa N, Hashimoto K, Liao XH, et al. (2006) Dominant role of thyrotropin-releasing hormone in the hypothalamic-pituitary-thyroid axis. *J Biol Chem* 281: 5000–5007.
25. Carr FE, Kaseem LL, Wong NC (1992) Thyroid hormone inhibits thyrotropin gene expression via a position-independent negative L-triiodothyronine-responsive element. *J Biol Chem* 267: 18689–18694.
26. Kim MK, McClaskey JH, Bodenner DL, Weintraub BD (1993) An AP-1-like factor and the pituitary-specific factor Pit-1 are both necessary to mediate hormonal induction of human thyrotropin beta gene expression. *J Biol Chem* 268: 23366–23375.
27. Wondisford FE, Steinfelder HJ, Nations M, Radovick S (1993) AP-1 antagonizes thyroid hormone receptor action on the thyrotropin beta-subunit gene. *J Biol Chem* 268: 2749–2754.
28. Gothe S, Wang Z, Ng L, Kindblom JM, Barros AC, et al. (1999) Mice devoid of all known thyroid hormone receptors are viable but exhibit disorders of the pituitary-thyroid axis, growth, and bone maturation. *Genes Dev* 13: 1329–1341.
29. Nakano K, Matsushita A, Sasaki S, Misawa H, Nishiyama K, et al. (2004) Thyroid-hormone-dependent negative regulation of thyrotropin beta gene by thyroid hormone receptors: study with a new experimental system using CV1 cells. *Biochem J* 378: 549–557.
30. Gordon DF, Lewis SR, Haugen BR, James RA, McDermott MT, et al. (1997) Pit-1 and GATA-2 interact and functionally cooperate to activate the thyrotropin beta-subunit promoter. *J Biol Chem* 272: 24339–24347.
31. Kashiwabara Y, Sasaki S, Matsushita A, Nagayama K, Ohba K, et al. (2009) Functions of PIT1 in GATA2-dependent transactivation of the thyrotropin beta promoter. *J Mol Endocrinol* 42: 225–237.
32. Jensen FC, Girardi AJ, Gilden RV, Koprowski H (1964) Infection of Human and Simian Tissue Cultures with Rous Sarcoma Virus. *Proc Natl Acad Sci U S A* 52: 53–59.
33. Matsushita A, Sasaki S, Kashiwabara Y, Nagayama K, Ohba K, et al. (2007) Essential role of GATA2 in the negative regulation of thyrotropin beta gene by thyroid hormone and its receptors. *Mol Endocrinol* 21: 865–884.
34. Nagayama K, Sasaki S, Matsushita A, Ohba K, Iwaki H, et al. (2008) Inhibition of GATA2-dependent transactivation of the TSHbeta gene by ligand-bound estrogen receptor alpha. *J Endocrinol* 199: 113–125.
35. Charles MA, Saunders TL, Wood WM, Owens K, Parlow AF, et al. (2006) Pituitary-specific Gata2 knockout: effects on gonadotrope and thyrotrope function. *Mol Endocrinol* 20: 1366–1377.
36. Yusta B, Alarid ET, Gordon DF, Ridgway EC, Mellon PL (1998) The thyrotropin beta-subunit gene is repressed by thyroid hormone in a novel thyrotrope cell line, mouse T alphaT1 cells. *Endocrinology* 139: 4476–4482.
37. Sasaki S, Nakamura H, Tagami T, Miyoshi Y, Nakao K (1995) Functional properties of a mutant T3 receptor beta (R338W) identified in a subject with pituitary resistance to thyroid hormone. *Mol Cell Endocrinol* 113: 109–117.
38. de la Pena P, Delgado LM, del Camino D, Barros F (1992) Two isoforms of the thyrotropin-releasing hormone receptor generated by alternative splicing have indistinguishable functional properties. *J Biol Chem* 267: 25703–25708.
39. Wood WM, Ocran KW, Kao MY, Gordon DF, Alexander LM, et al. (1990) Protein factors in thyrotropic tumor nuclear extracts bind to a region of the mouse thyrotropin beta-subunit promoter essential for expression in thyrotropes. *Mol Endocrinol* 4: 1897–1904.
40. Hashimoto K, Zanger K, Hollenberg AN, Cohen LE, Radovick S, et al. (2000) cAMP response element-binding protein-binding protein mediates thyrotropin-releasing hormone signaling on thyrotropin subunit genes. *J Biol Chem* 275: 33365–33372.
41. Steger DJ, Hecht JH, Mellon PL (1994) GATA-binding proteins regulate the human gonadotropin alpha-subunit gene in the placenta and pituitary gland. *Mol Cell Biol* 14: 5592–5602.
42. Akerblom IE, Ridgway EC, Mellon PL (1990) An alpha-subunit-secreting cell line derived from a mouse thyrotrope tumor. *Mol Endocrinol* 4: 589–596.
43. Fowkes RC, King P, Burrin JM (2002) Regulation of human glycoprotein hormone alpha-subunit gene transcription in LbetaT2 gonadotropes by protein kinase C and extracellular signal-regulated kinase 1/2. *Biol Reprod* 67: 725–734.
44. Lee ME, Temizer DH, Clifford JA, Quertermous T (1991) Cloning of the GATA-binding protein that regulates endothelin-1 gene expression in endothelial cells. *J Biol Chem* 266: 16188–16192.
45. Menghini R, Marchetti V, Cardellini M, Hribal ML, Mauriello A, et al. (2005) Phosphorylation of GATA2 by Akt increases adipose tissue differentiation and reduces adipose tissue-related inflammation: a novel pathway linking obesity to atherosclerosis. *Circulation* 111: 1946–1953.
46. Haugen BR, McDermott MT, Gordon DF, Rupp CL, Wood WM, et al. (1996) Determinants of thyrotrope-specific thyrotropin beta promoter activation. Cooperation of Pit-1 with another factor. *J Biol Chem* 271: 385–389.
47. Gutierrez-Hartmann A, Duval DL, Bradford AP (2007) ETS transcription factors in endocrine systems. *Trends Endocrinol Metab* 18: 150–158.
48. Ooi GT, Tawadros N, Escalona RM (2004) Pituitary cell lines and their endocrine applications. *Mol Cell Endocrinol* 228: 1–21.
49. Kim KK, Song SB, Kang KI, Rhee M, Kim KE (2007) Activation of the thyroid-stimulating hormone beta-subunit gene by LIM homeodomain transcription factor Lhx2. *Endocrinology* 148: 3468–3476.
50. Yamagata T, Nishida J, Sakai R, Tanaka T, Honda H, et al. (1995) Of the GATA-binding proteins, only GATA-4 selectively regulates the human interleukin-5 gene promoter in interleukin-5-producing cells which express multiple GATA-binding proteins. *Mol Cell Biol* 15: 3830–3839.
51. Gershengorn MC, Osman R (1996) Molecular and cellular biology of thyrotropin-releasing hormone receptors. *Physiol Rev* 76: 175–191.
52. Towatari M, May GE, Marais R, Perkins GR, Marshall CJ, et al. (1995) Regulation of GATA-2 phosphorylation by mitogen-activated protein kinase and interleukin-3. *J Biol Chem* 270: 4101–4107.
53. Duval DL, Jonsen MD, Diamond SE, Murapa P, Jean A, et al. (2007) Differential utilization of transcription activation subdomains by distinct coactivators regulates Pit-1 basal and Ras responsiveness. *Mol Endocrinol* 21: 172–185.
54. Abrahamson MJ, Wormald PJ, Millar RP (1987) Neuroendocrine regulation of thyrotropin release in cultured human pituitary cells. *J Clin Endocrinol Metab* 65: 1159–1163.
55. Kiley SC, Parker PJ, Fabbro D, Jaken S (1991) Differential regulation of protein kinase C isozymes by thyrotropin-releasing hormone in GH4C1 cells. *J Biol Chem* 266: 23761–23768.
56. Minami T, Abid MR, Zhang J, King G, Kodama T, et al. (2003) Thrombin stimulation of vascular adhesion molecule-1 in endothelial cells is mediated by protein kinase C (PKC)-delta-NF-kappa B and PKC-zeta-GATA signaling pathways. *J Biol Chem* 278: 6976–6984.
57. Kadri Z, Maoche-Chretien L, Rooke HM, Orkin SH, Romeo PH, et al. (2005) Phosphatidylinositol 3-kinase/Akt induced by erythropoietin renders the erythroid differentiation factor GATA-1 competent for TIMP-1 gene transactivation. *Mol Cell Biol* 25: 7412–7422.
58. Ito M, Yuan CX, Okano HJ, Darnell RB, Roeder RG (2000) Involvement of the TRAP220 component of the TRAP/SMCC coactivator complex in embryonic development and thyroid hormone action. *Mol Cell* 5: 683–693.
59. Gordon DF, Tucker EA, Tundwal K, Hall H, Wood WM, et al. (2006) MED220/thyroid receptor-associated protein 220 functions as a transcriptional coactivator with Pit-1 and GATA-2 on the thyrotropin-beta promoter in thyrotropes. *Mol Endocrinol* 20: 1073–1089.
60. Misra P, Owuor ED, Li W, Yu S, Qi C, et al. (2002) Phosphorylation of transcriptional coactivator peroxisome proliferator-activated receptor (PPAR)-binding protein (PBP). Stimulation of transcriptional regulation by mitogen-activated protein kinase. *J Biol Chem* 277: 48745–48754.
61. Pandey PK, Udayakumar TS, Lin X, Sharma D, Shapiro PS, et al. (2005) Activation of TRAP/mediator subunit TRAP220/Med1 is regulated by mitogen-activated protein kinase-dependent phosphorylation. *Mol Cell Biol* 25: 10695–10710.

62. Mittag J, Friedrichsen S, Strube A, Heuer H, Bauer K (2009) Analysis of hypertrophic thyrotrophs in pituitaries of athyroid Pax8<sup>-/-</sup> mice. *Endocrinology* 150: 4443–4449.
63. Chan V, Wang C, Yeung RT (1979) Thyrotropin: alpha- and beta-subunits of thyrotropin, and prolactin responses to four-hour constant infusions of thyrotropin-releasing hormone in normal subjects and patients with pituitary-thyroid disorders. *J Clin Endocrinol Metab* 49: 127–131.
64. Chadick JZ, Asturias FJ (2005) Structure of eukaryotic Mediator complexes. *Trends Biochem Sci* 30: 264–271.
65. Abel ED, Ahima RS, Boers ME, Elmquist JK, Wondisford FE (2001) Critical role for thyroid hormone receptor beta2 in the regulation of paraventricular thyrotropin-releasing hormone neurons. *J Clin Invest* 107: 1017–1023.
